# Supplementary material
Source: Springer Nature journal article supplement (https://www.springermedizin.de/resource/supplementary/12889_2011_3859_MOESM1_ESM.pdf/9490790)
Supplement: MOESM1 [file 9490790]

## **362 (100%) PTB patients**

- Culture confirmed PTB seen at Tarrant County TB clinic during study duration

### **42(12%) PFT not done**

- 23 died prior to 20 weeks
- 14 transferred to other jurisdictions prior to enrolment in study
- 4 incarcerated
- 1 had myopathy

## **320 (88%) Acceptable PFT data analyzed**

- 320 Pulmonary Tuberculosis
  - 69 (22%) White
  - 85 (27%) Black
  - 81 (25%) Asian
  - 82 (26%) Hispanic
  - 3 (0.9%) Other – excluded in further analysis\*
